# Supplementary material for: Efficiency enhancement in an indacenodithiophene and thieno[3,4-c]pyrrole-4,6-dione backbone photovoltaic polymer with an extended thieno[3,2-b]thiophene π-bridge
Source: Royal Society of Chemistry journal article supplement (doi:10.1039/c6tc01238h), 2016-01-01
Supplement: c6tc01238h1.pdf [file c6tc01238h1.pdf]

## Efficiency enhancement in indacenodithiophene and thieno[3,4-*c*]pyrrole-4,6-dione backboned photovoltaic polymer with extended thieno[3,2-*b*]thiophene $\pi$ -bridge†

Huilin Zheng,<sup>a, b, †</sup> Jiuxing Wang,<sup>b, d, †</sup> Weiye Chen,<sup>a, b</sup> Chuantao Gu,<sup>b, d</sup> Junzhen, Ren,<sup>a, b</sup> Meng Qiu,<sup>b</sup> Renqiang Yang,<sup>\*b</sup> Mingliang Sun<sup>\*a</sup>

a. Institute of Materials Science and Engineering, Ocean University of China, Qingdao 266100, China. E-mail: [mlsun@ouc.edu.cn](mailto:mlsun@ouc.edu.cn)

b. CAS key Laboratory of Bio-based Materials, Qingdao Institute of Bioenergy and Bioprocess Technology, Chinese Academy Science, Qingdao 266101, China. E-mail: [yangrq@qibebt.ac.cn](mailto:yangrq@qibebt.ac.cn)

c. State Key Laboratory of Luminescent Materials and Devices, South China University of Technology, Guangzhou 510640, China

d. University of Chinese Academy of Sciences, Beijing 100049, China

† These authors contributed equally to this work.

### 1. Materials

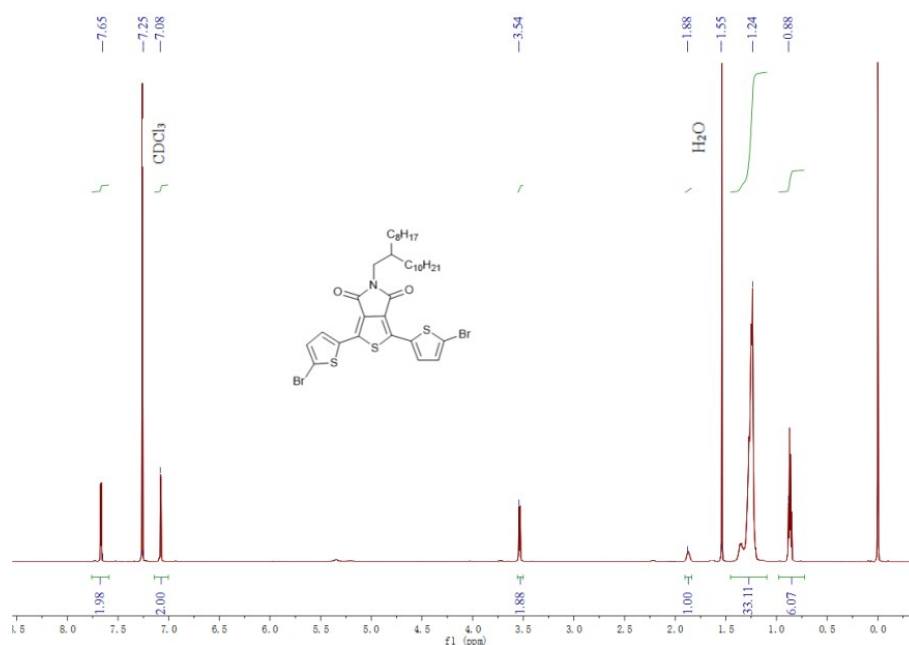

**Fig. S1** <sup>1</sup>H NMR spectra of monomer T-TPD.

T-TPD: <sup>1</sup>H NMR (600 MHz, CDCl<sub>3</sub>, TMS),  $\delta$  (ppm): 7.65 (d,  $J = 4.0$  Hz, 2H), 7.08 (d,  $J = 4.0$  Hz, 2H), 3.54 (d,  $J = 7.3$  Hz, 2H), 1.87 (s, 1H), 1.45-1.09 (m, 32H), 0.88 (t,  $J = 6.0$  Hz, 6H).

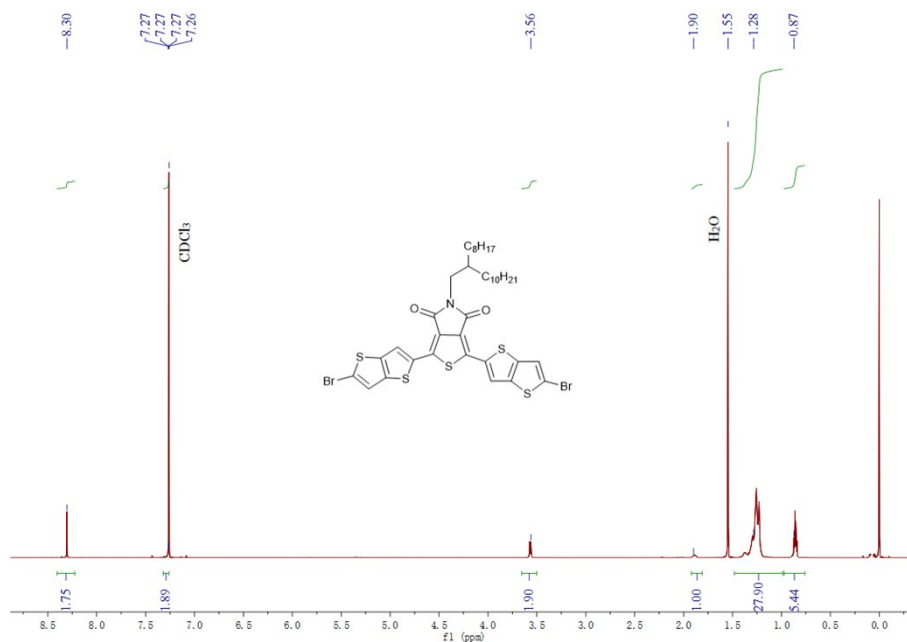

**Fig. S2**  $^1\text{H}$  NMR spectra of monomer TT-TPD.

TT-TPD:  $^1\text{H}$  NMR (600 MHz,  $\text{CDCl}_3$ , TMS),  $\delta$  (ppm): 8.30 (s, 2H), 7.27 (s, 2H), 3.57 (d,  $J = 7.3$  Hz, 2H), 1.89 (s, 1H), 1.45-1.02 (m, 32H), 0.86 (t,  $J = 6.8$  Hz, 6H).

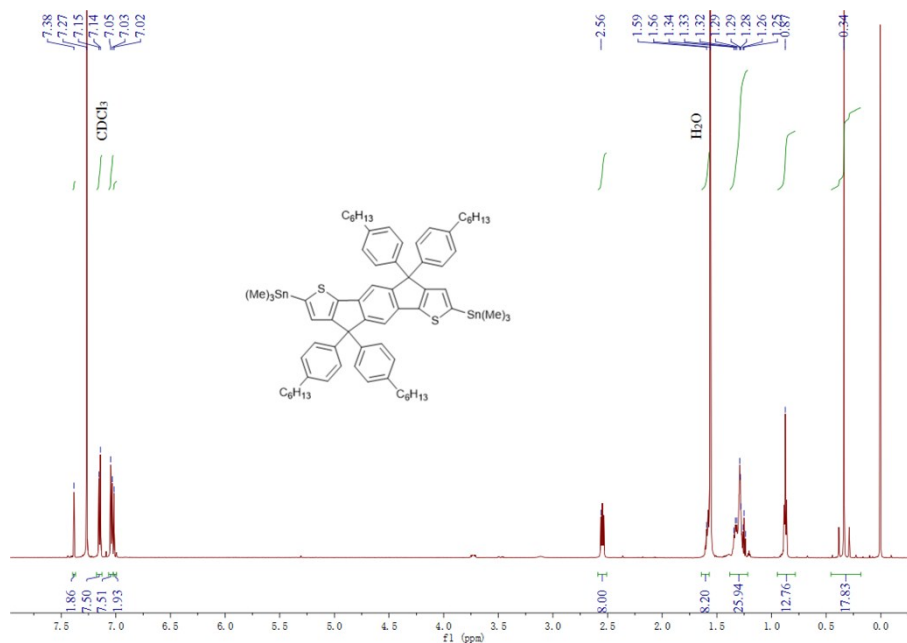

**Fig. S3**  $^1\text{H}$  NMR spectra of monomer IDT-di-Tin.

IDT-di-Tin:  $^1\text{H}$  NMR (600 MHz,  $\text{CDCl}_3$ , TMS),  $\delta$  (ppm): 7.38 (s, 2H), 7.15 (d,  $J = 8.2$  Hz, 8H), 7.04 (d,  $J = 8.2$  Hz, 8H), 7.02 (s, 2H), 2.55 (t,  $J = 7.9$  Hz, 8H), 1.64-1.57 (m, 8H), 1.36-1.22 (m, 24H), 0.87 (t,  $J = 6.9$  Hz, 12H), 0.34 (s, 18H).

## 2. Instrument

$^1\text{H}$  NMR spectra were recorded using a Bruker DRX-600 (600 MHz) spectrometer in  $\text{CDCl}_3$  with tetramethylsilane (TMS) as internal standard and in ambient conditions. Elemental analysis data was recorded on a Vario EI Cube elemental analyzer. The molecular weight of the polymer was measured by gel permeation chromatography (GPC), and polystyrene was used as a standard, THF as the eluent. Thermogravimetric analysis (TGA) measurements were performed by a STA-409 at a heating rate of  $10\text{ }^\circ\text{C min}^{-1}$  under nitrogen atmosphere. X-ray diffraction (XRD) spectra were recorded on a Bruker D8 Advance Spectra. Ultraviolet-visible (UV-vis) absorption spectra were recorded using a Hitachi U-4100 spectrophotometer. Cyclic voltammetry (CV) was performed on a CHI 660D electrochemical workstation with a three-electrode system consisting of a platinum disk working electrode (2.0 mm in diameter), a saturated calomel reference electrode (SCE) and a platinum wire counter electrode in a solution of 0.1 M tetrabutylammonium phosphorus hexafluoride ( $\text{Bu}_4\text{NPF}_6$ ) in acetonitrile at a scan rate of  $50\text{ mV s}^{-1}$ . Polymer thin films were deposited from DCB solution onto the platinum working electrodes and dried under nitrogen prior to measurement. The redox potential of the ferrocene/ferrocenium ( $\text{Fc}/\text{Fc}^+$ ) internal reference is 0.39 V vs. SCE. The space-charge-limited current (SCLC) measurements were carried out using an HZ-5000 electrochemical analyzer. Surface roughness and morphology of thin films were characterized by atomic force microscopy (AFM) on an Agilent 5400 and transmission electron microscope by HITACHI H-7650.

### 3. Thermal gravity analysis (TGA)

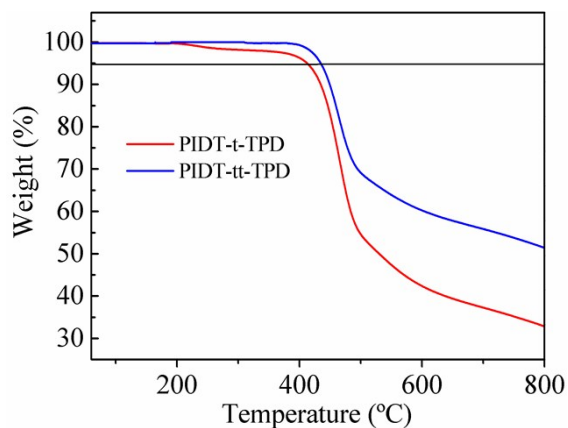

Fig. S4 TGA plot of PIDT-t-TPD and PIDT-tt-TPD under nitrogen atmosphere.

### 4. X-ray diffraction

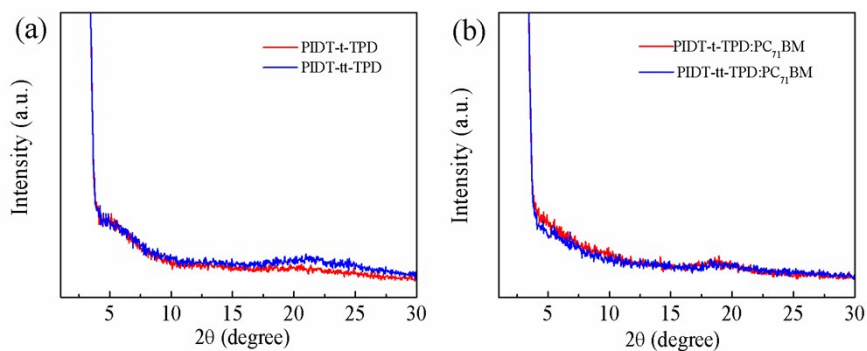

**Fig. S5** XRD patterns of pure polymers (a) and polymer/PC<sub>71</sub>BM blend films (b).

## 5. Optical properties

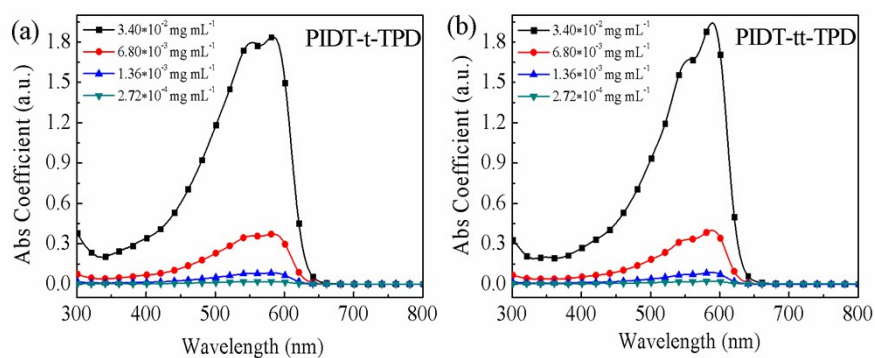

**Figure S6.** UV-vis absorption spectra of PIDT-t-TPD and PIDT-tt-TPD dissolved in DCB at various concentrations.

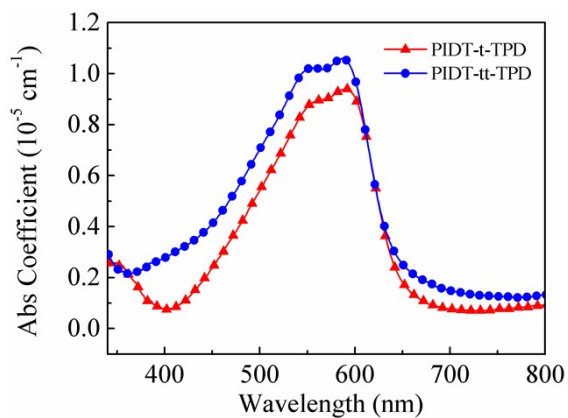

**Fig. S7** Extinction coefficients of the polymer films.

## 6. Hole mobility

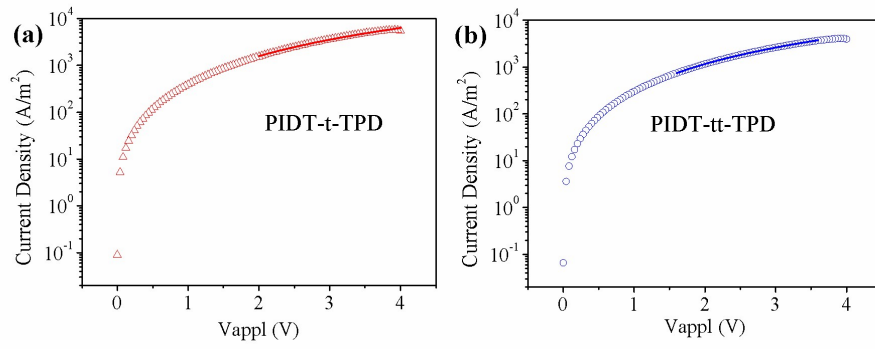

**Fig. S8** Current density-voltage ( $J$ - $V$ ) curves for PIDT-t-TPD:PC<sub>71</sub>BM based device (a) and PIDT-tt-TPD:PC<sub>71</sub>BM based device (b) (the symbols are experimental data for transport of hole, and the solid line is fitted according to the space-charge-limited-current model). The configuration of the devices is ITO/PEDOT:PSS/polymer:PC<sub>71</sub>BM/MoO<sub>3</sub>/Al.
